# Supplementary material
Source: Springer Nature journal article supplement (https://www.springermedizin.de/resource/supplementary/12911_2010_386_MOESM1_ESM.pdf/9525776)
Supplement: MOESM1 [file 9525776]

assessed for eligibility by medical oncologist

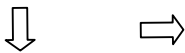

exclusion criteria

- labile personality structure
- Karnofsky performance score < 60
- insufficient knowledge of the Dutch language

initial invitation by the oncologist or a nurse

- *medical history*
- *substitute judgment of information desire*

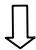

phone call by the researcher followed by written informed consent

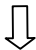

baseline questionnaire (t1)

- *sociodemographic data*
- *well-being measures*
- *predictors of information desire*

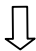

diagnosis of progression: treatment choice

- *estimate of survival by oncologist*

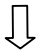

randomization

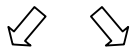

usual care  
(n=70)

usual care and interview using the decision aid  
(n=100)

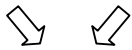

follow-up questionnaire after one week (t2)

- *well-being measures*
- *other effects on coping, information, knowledge, decision, and treatment attitudes*

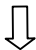

follow-up questionnaire after eight weeks (t3)

- *well-being measures*
- *other effects on coping, information, knowledge, decision, and treatment attitudes*
